# Supplementary material
Source: publisher figshare collection journal article supplement (https://acs.figshare.com/ndownloader/files/26711395)
Supplement: Supplementary file 1 [file 26711395]

## Supporting information

**Title of the manuscript:** Immunization with *Brugia malayi* Calreticulin protein generates robust anti-parasitic immunity and offers protection during experimental Lymphatic filariasis

**Authors:** Sunita Yadav<sup>a,#</sup>, Pankaj Sharma<sup>b,#</sup>, Aditi Sharma<sup>b,c</sup>, Laxmi Ganga<sup>b</sup>, Jitendra Kumar Saxena<sup>a,c,\*</sup>, Mrigank Srivastava<sup>b,c,\*</sup>

### Authors affiliations:

<sup>a</sup>Biochemistry Division, CSIR-Central Drug Research Institute, Lucknow - 226031, India.

<sup>b</sup>Molecular Parasitology and Immunology Division, CSIR-Central Drug Research Institute, Lucknow - 226031, India.

<sup>c</sup>Academy of Scientific and Innovative Research (AcSIR), Ghaziabad - 201002, India.

**# These authors have equal contribution**

**\* Corresponding authors information:**

1. Jitendra Kumar Saxena, [jkscdri@yahoo.com](mailto:jkscdri@yahoo.com)

2. Mrigank Srivastava, [mrigank\\_srivastava@cdri.res.in](mailto:mrigank_srivastava@cdri.res.in)

### Present address:

**Sunita Yadav:** School of Biochemical Engineering, Indian Institute of Technology Banaras Hindu University, Varanasi - 221005, India.

**Pankaj Sharma:** Program in Cellular and Molecular Medicine, Boston Children's Hospital, Boston - 02115, MA, United States.

**Aditi Sharma:** Department of Pathology, University of California, San Diego - 92093, CA, USA.

**Number of Pages:** 1

**Number of Figures:** 1

## Results

**Figure S1: ClustalW multiple sequence alignment of Calreticulin protein from *Brugia malayi* (bm) and *Wuchereria bancrofti* (w) showing 97% homology.**

### Supplementary figure 1

10/9/2020

CLUSTALW Result

#### CLUSTALW Result

[\[clustalw.aln\]](#)[\[clustalw.dnd\]](#)[\[readme\]](#)

Select tree menu

#### CLUSTAL 2.1 Multiple Sequence Alignments

Sequence type explicitly set to Protein  
Sequence format is Pearson  
Sequence 1: w 404 aa  
Sequence 2: bm 404 aa  
Start of Pairwise alignments  
Aligning...

Sequences (1:2) Aligned. Score: 97.0297  
Guide tree file created: [\[clustalw.dnd\]](#)

There are 1 groups  
Start of Multiple Alignment

Aligning...  
Group 1: Sequences: 2 Score:6764  
Alignment Score 2577

CLUSTAL-Alignment file created [\[clustalw.aln\]](#)

[clustalw.aln](#)

#### CLUSTAL 2.1 multiple sequence alignment

```
w      MQLYLLGLVCFSVSAKVYFKEEFSDDDWEKRWIKSKHKDDFGKWEISHGKFYGDAAKD
bm     MQLYLLGLVCFSAVSAKIYFKEEFSDDDWEKRWIKSKHKDDFGKWEISHGKFYGDAVKD
*****.****.******

w      KGLKTAQDAKFYSIGAKFEKGFSNKGKSLVVQFSVKHEQIDCGGGYVKLMASNVNLEDF
bm     RGLKTAQDAKFYSIGAKFEKGFSNKGKSLVVQFSVKHEQIDCGGGYIKLMASDVNLEDF
*****.****.******

w      HGETPYHIMFGPDICGPGTKKVHVFHYKGRNHMIKKDIRCKDDVFTHLYTLIVNSDNTY
bm     HGETPYHIMFGPDICGPGTKKVHVFHYKGRNHMIKKDIRCKDDVFTHLYTLIVNSDNTY
*****.****.******

w      EVQINGEKVESGELEADWDFLPPKKIKDPDAKKPEDWDEREYIDDEDDKKPEDWKPPEHI
bm     EVQINGEKVESGELEADWDFLPPKKIKDPDAKKPEDWDEREYIDDEDDKKPEDWKPPEHI
*****.****.******

w      PDPDAKKPEDWDEMDGEWEPPMVDNPEYKGEWPKQKKNPAYKGKWIHPEIDNPDYTPD
bm     PDPDAKKPEDWDEMDGEWEPPMVDNPEYKGEWPKQKKNPAYKGKWIHPEIDNPDYTPD
*****.****.******

w      DDLYIYEDIGAIGFDLWQVKSGETIFDDIIVTDNVEEAKKFGEKTLKKTKEGEKKMKEKQD
bm     DDLYLYGDIGAVGFDLWQVKSGETIFDDVIIVTDSVEEAKKFGEKTLKKTKEGEKKMKEKQD
*****.****.******

w      EEEEKKRKEEEEKKKEEEDKEEEEKEEKKKDETHEEL
bm     EEEEKKRKEEEEKKKEEEDKEEEEKEEKKKDETHEEL
*****.****.******
```

<https://www.genome.jp/tools-bin/clustalw>
